# Supplementary material for: A regional modelling study of halogen chemistry within a volcanic plume of Mt Etna's Christmas 2018 eruption
Source: Copernicus journal article supplement (doi:10.5194/acp-23-10533-2023), 2023-09-25
Supplement: Supplementary file 1 [file acp-23-10533-2023-supplement.pdf]

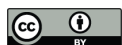

*Supplement of*

## **A regional modelling study of halogen chemistry within a volcanic plume of Mt Etna's Christmas 2018 eruption**

**Herizo Narivelo et al.**

*Correspondence to:* Paul David Hamer ([paul.hamer@nilu.no](mailto:paul.hamer@nilu.no))

The copyright of individual parts of the supplement might differ from the article licence.

# 1 Figures

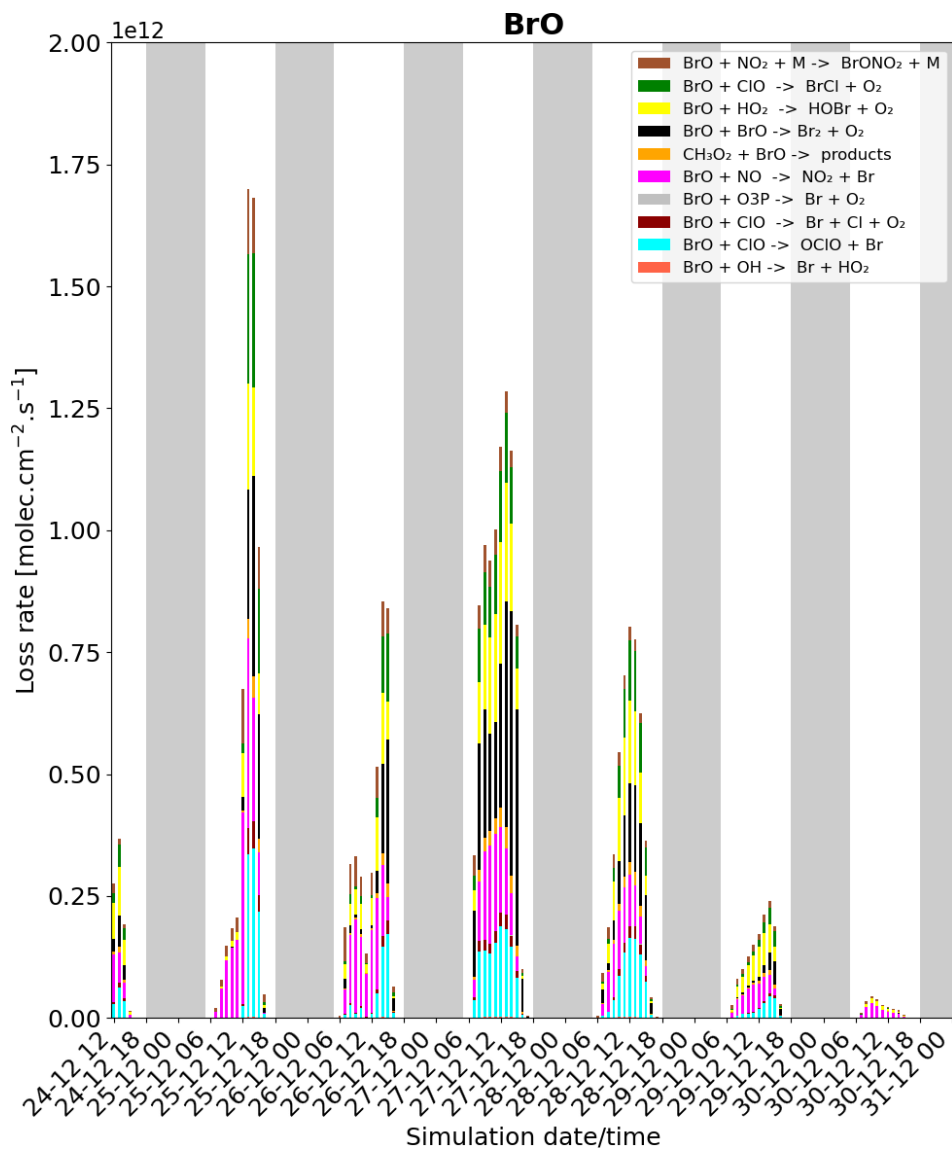

**Figure S1.** Time evolution of BrO loss rates in [molec.cm<sup>-2</sup>.s<sup>-1</sup>] without the photolysis of BrO and the BrO + BrO → Br + Br + O<sub>2</sub> reaction, from 24 December at 12:00 to 31 December 2018 at 00:00 UTC in the near volcano plume.

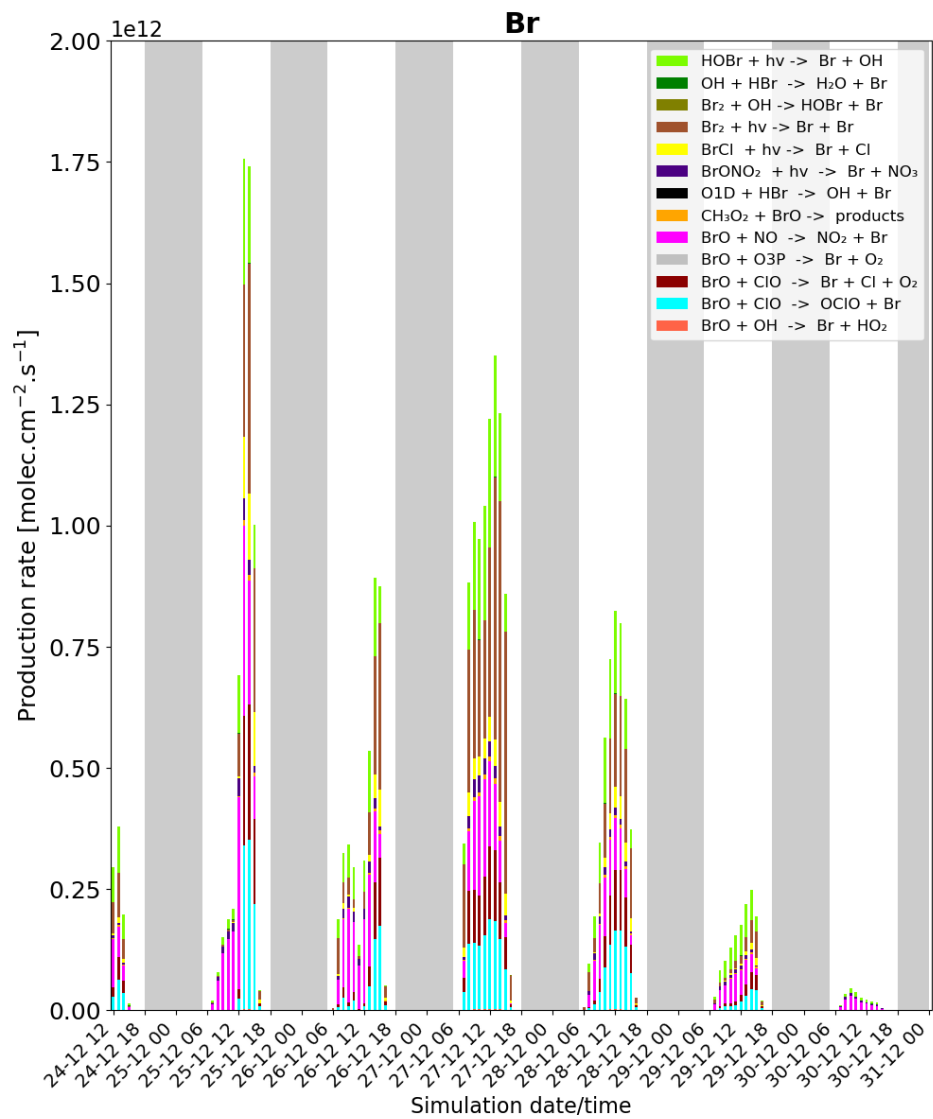

**Figure S2.** Time evolution of Br production rates in [molec.cm<sup>-2</sup>.s<sup>-1</sup>] without the photolysis of BrO and the BrO + BrO → Br + Br + O<sub>2</sub> reaction, from 24 December at 12:00 to 31 December 2018 at 00:00 UTC in the near volcano plume.

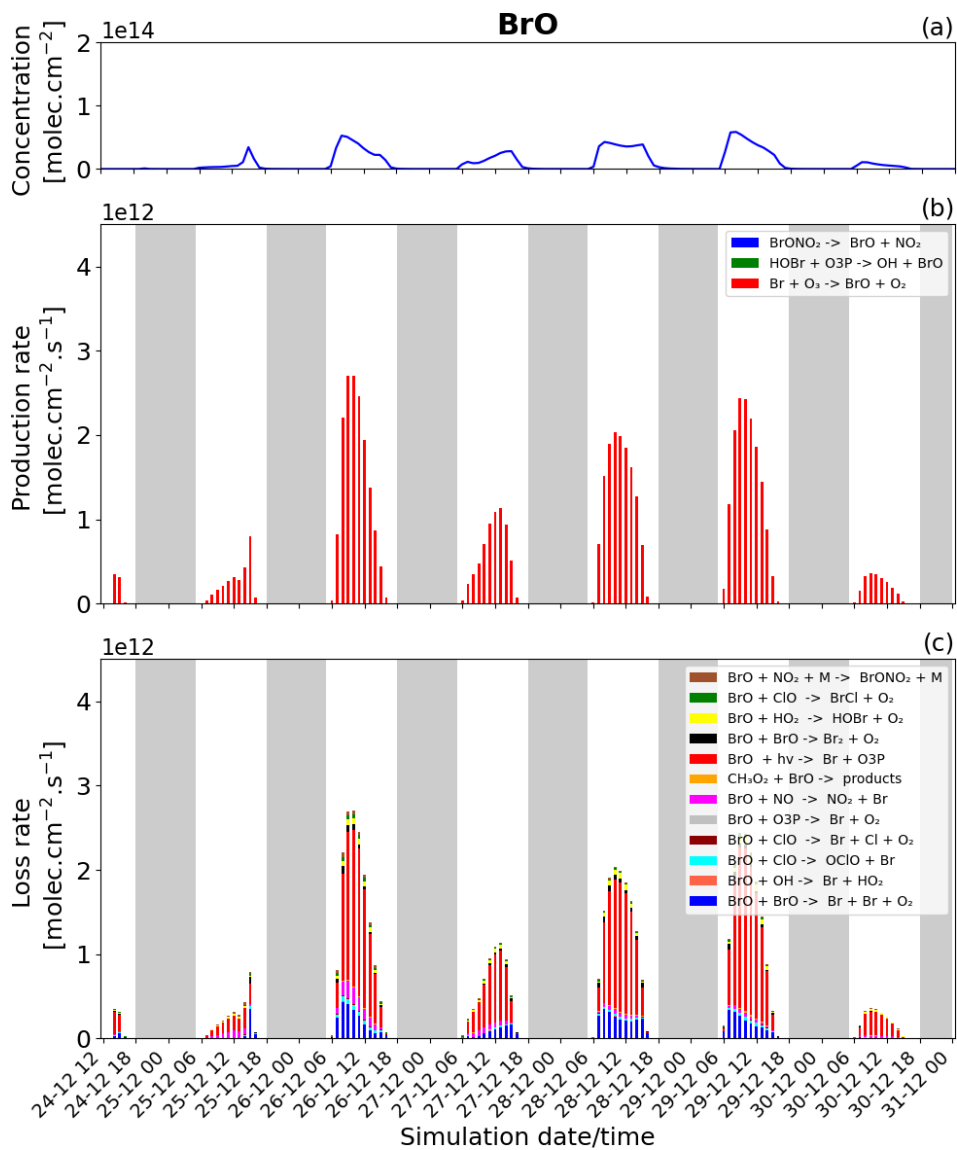

**Figure S3.** Time evolution of : (a) BrO column concentration in [molec.cm<sup>-2</sup>], (b) production rates and (c) loss rates for BrO both in [molec.cm<sup>-2</sup>.s<sup>-1</sup>] from 24 December at 14:00 to 31 December 2018 at 00:00 UTC in the young plume.

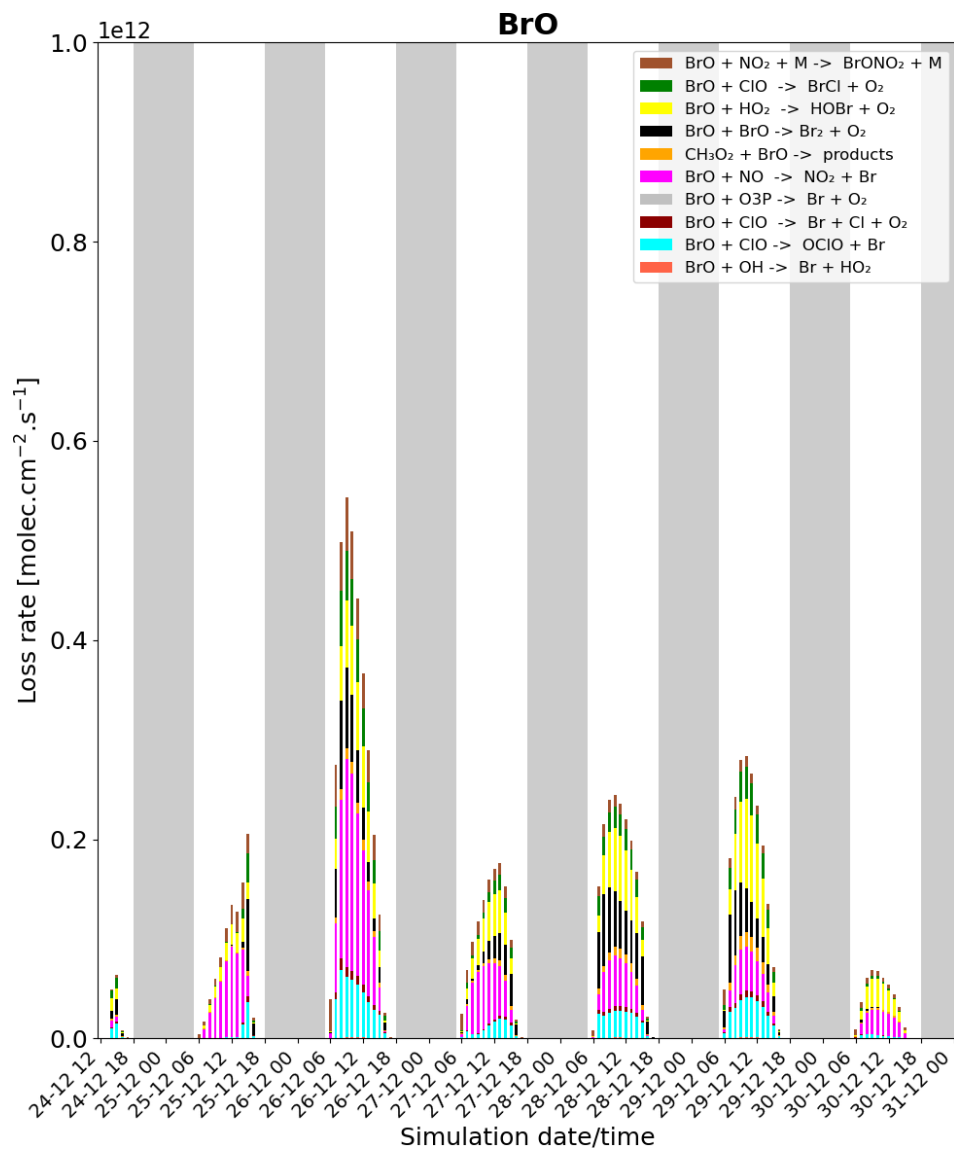

**Figure S4.** Time evolution of BrO loss rates in [molec.cm<sup>-2</sup>.s<sup>-1</sup>] without the photolysis of BrO and the BrO + BrO → Br + Br + O<sub>2</sub> reaction from 24 December at 14:00 to 31 December 2018 at 00:00 UTC in the young plume.

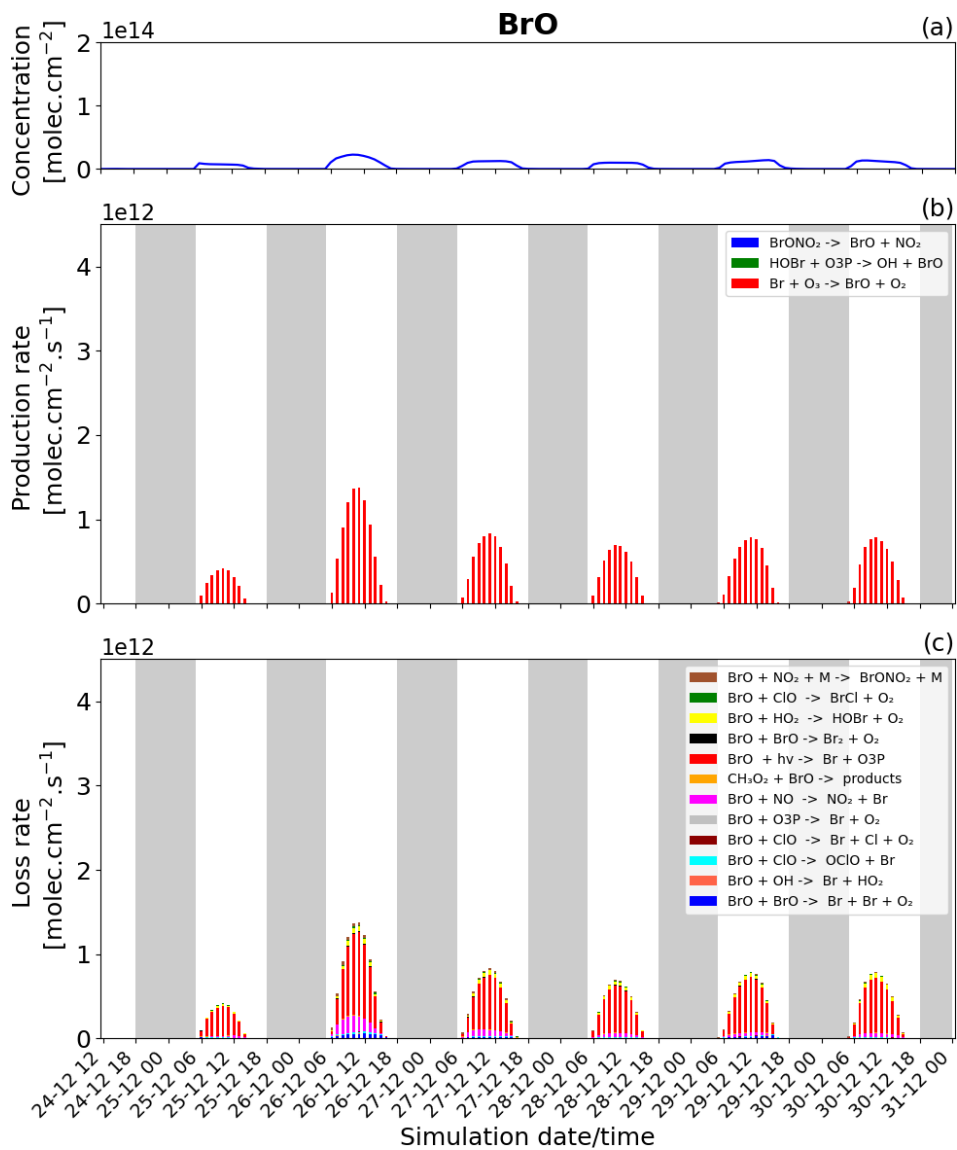

**Figure S5.** Time evolution of : (a) BrO column concentration in  $[\text{molec.cm}^{-2}]$ , (b) production rates and (c) loss rates for BrO both in  $[\text{molec.cm}^{-2}.\text{s}^{-1}]$  from 24 December at 20:00 to 31 December 2018 at 00:00 UTC in the aged plume.

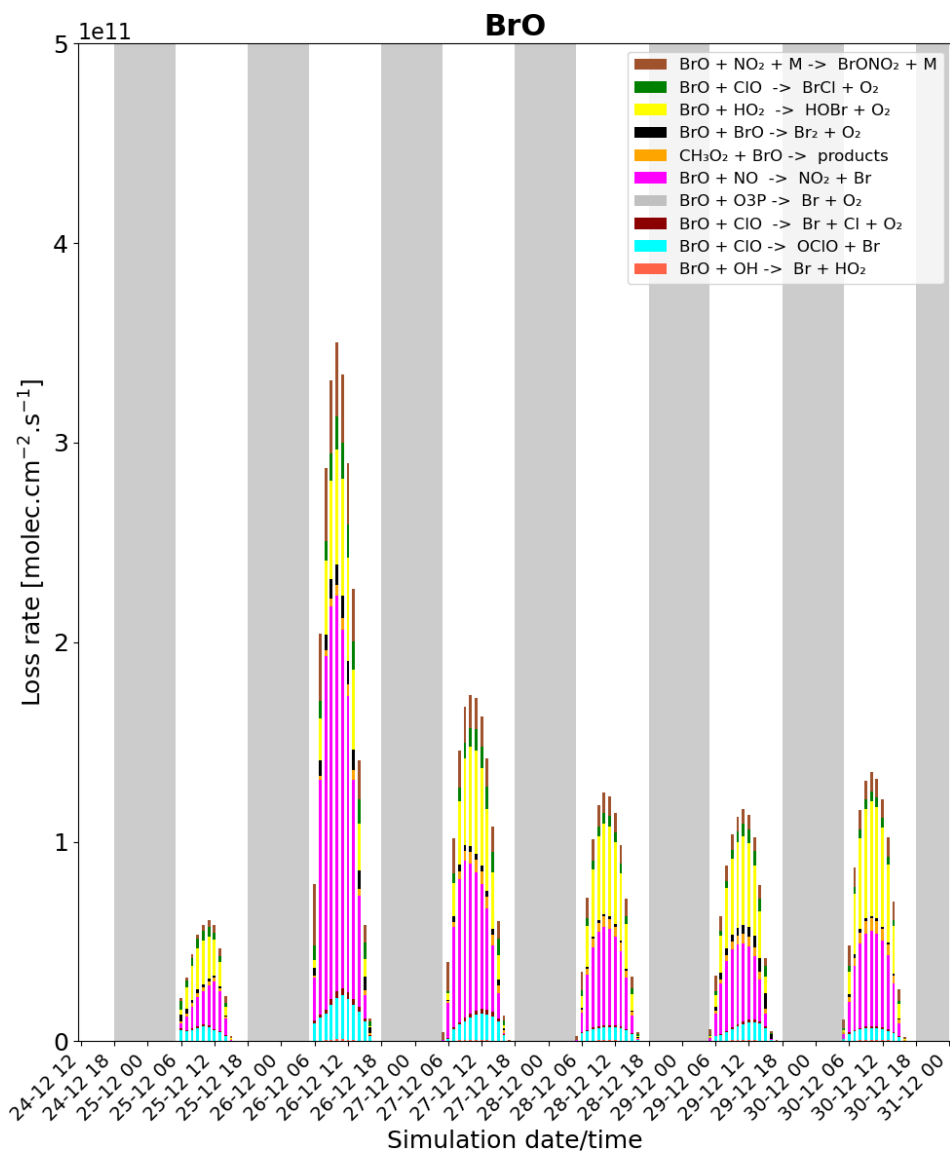

**Figure S6.** Time evolution of BrO loss rates in [molec.cm<sup>-2</sup>.s<sup>-1</sup>] without the photolysis of BrO and the BrO + BrO → Br + Br + O<sub>2</sub> reaction, from 24 December at 20:00 to 31 December 2018 at 00:00 UTC in the aged plume.

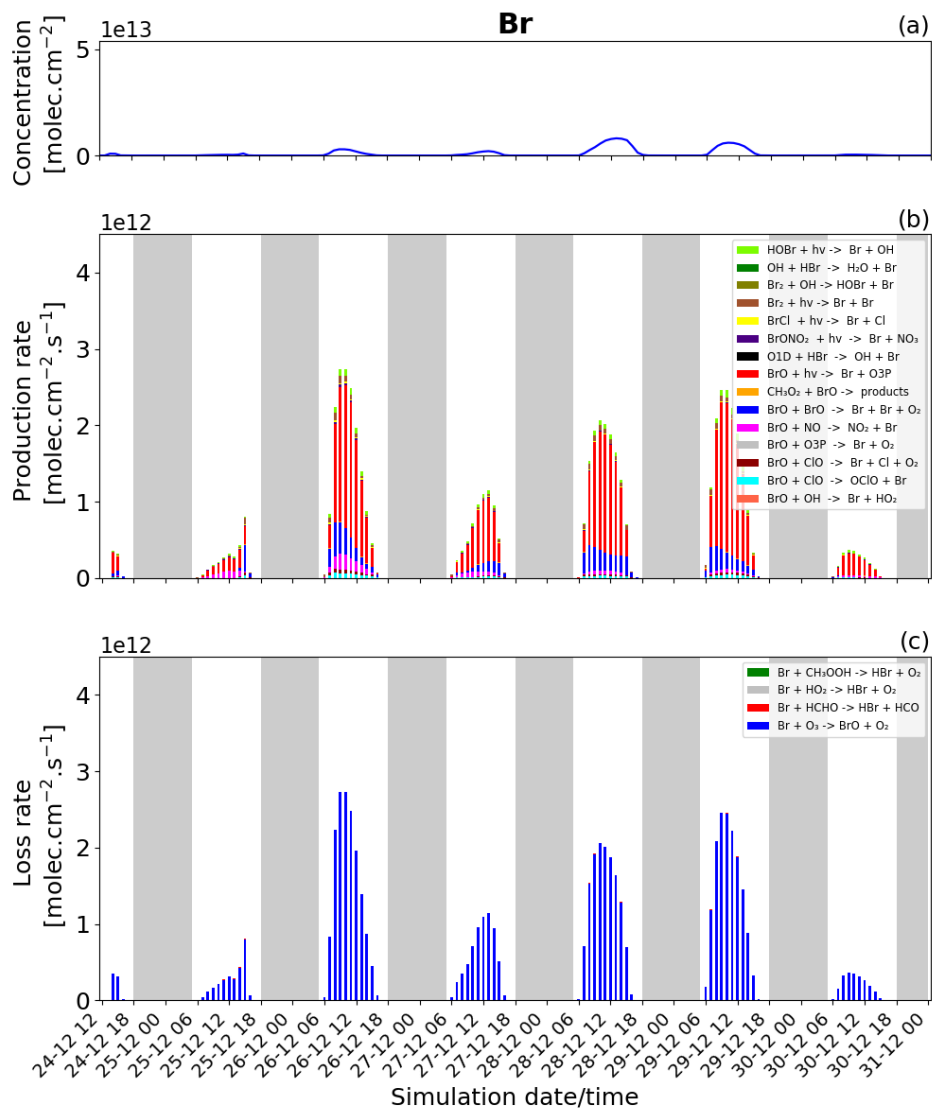

**Figure S7.** Time evolution of : (a) Br column concentration in  $[\text{molec.cm}^{-2}]$ , (b) production rates and (c) loss rates for Br both in  $[\text{molec.cm}^{-2}.\text{s}^{-1}]$  from 24 December at 14:00 to 31 December 2018 at 00:00 UTC in the young plume.



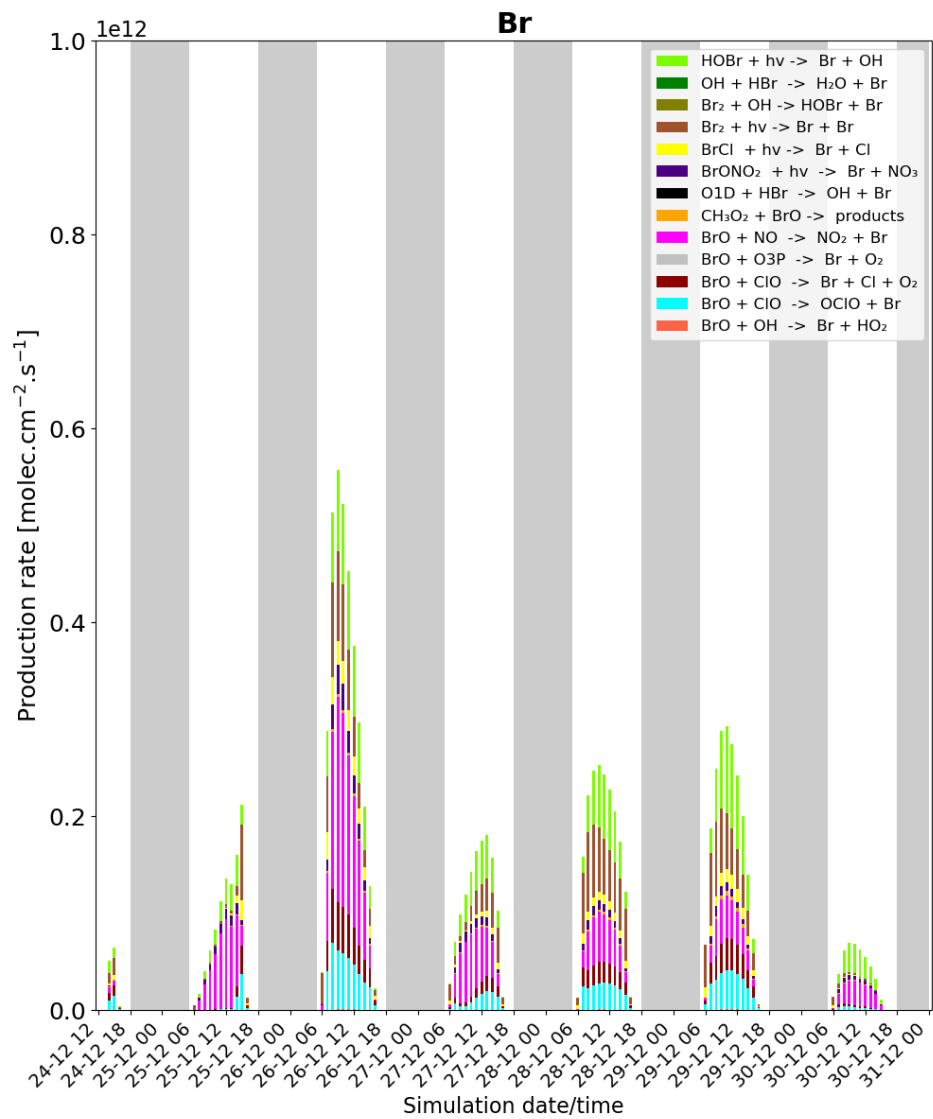

**Figure S8.** Time evolution of Br production rates in [molec.cm<sup>-2</sup>.s<sup>-1</sup>] without the photolysis of BrO and the BrO + BrO → Br + Br + O<sub>2</sub> reaction, from 24 December at 14:00 to 31 December 2018 at 00:00 UTC in the young plume.

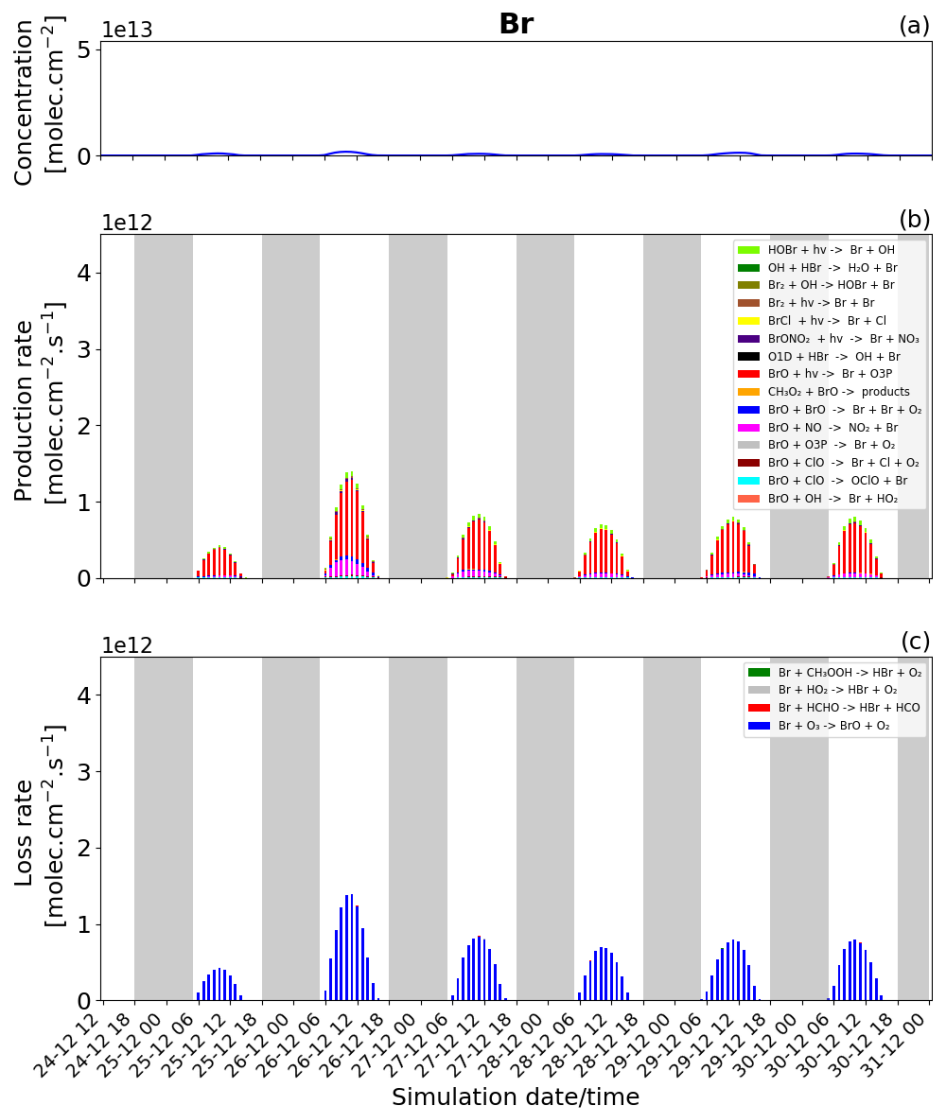

**Figure S9.** Time evolution of : (a) Br column concentration in  $[\text{molec.cm}^{-2}]$ , (b) production rates and (c) loss rates for Br both in  $[\text{molec.cm}^{-2}.\text{s}^{-1}]$  from 24 December at 20:00 to 31 December 2018 at 00:00 UTC in the aged plume.

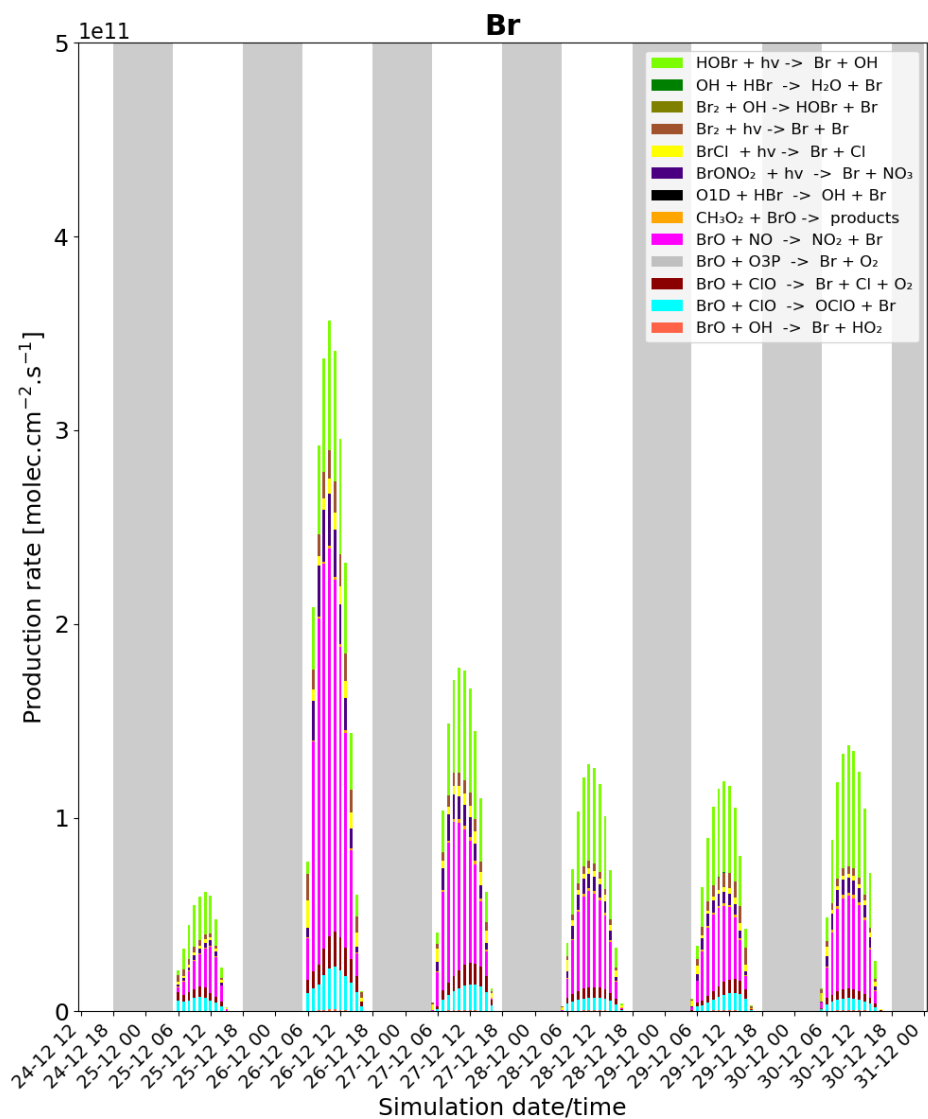

**Figure S10.** Time evolution of Br production rates in [molec.cm<sup>-2</sup>.s<sup>-1</sup>], without the photolysis of BrO and the BrO + BrO → Br + Br + O<sub>2</sub> reaction from 24 December at 20:00 to 31 December 2018 at 00:00 UTC in the aged plume.

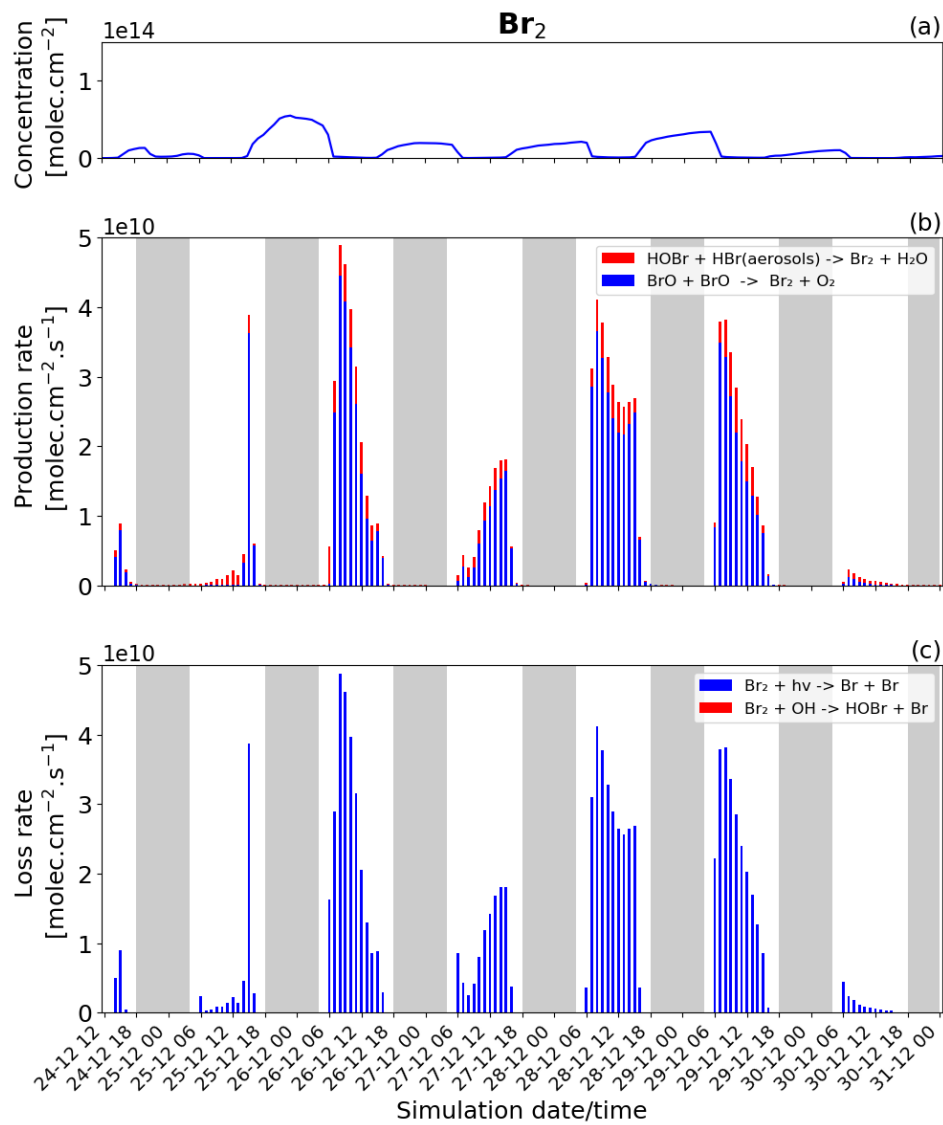

**Figure S11.** Time evolution of : (a)  $\text{Br}_2$  column concentration in  $[\text{molec. cm}^{-2}]$ , (b) production rates and (c) loss rates for  $\text{Br}_2$  both in  $[\text{molec. cm}^{-2} \cdot \text{s}^{-1}]$  from 24 December at 14:00 to 31 December 2018 at 00:00 UTC in the young plume.

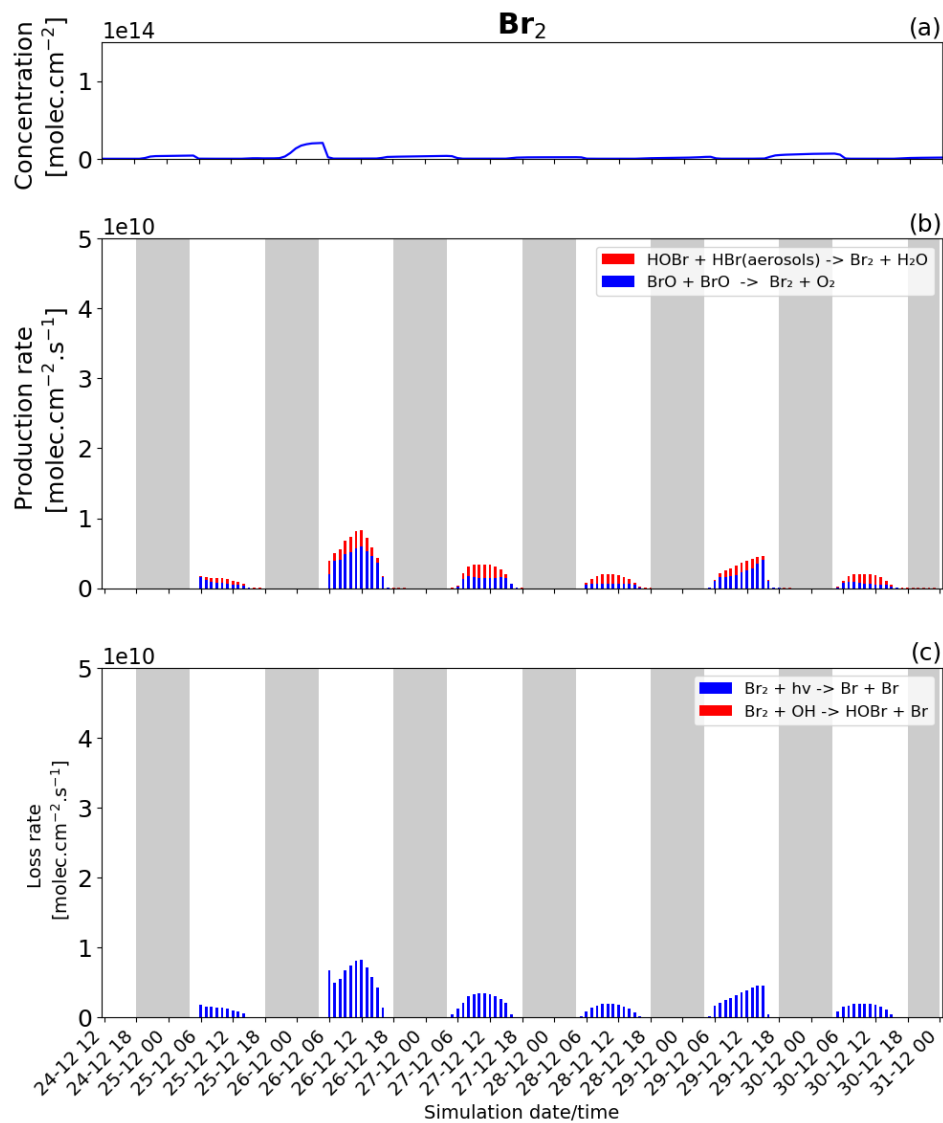

**Figure S12.** Time evolution of : (a) Br<sub>2</sub> column concentration in [molec.cm<sup>-2</sup>], (b) production rates and (c) loss rates for Br<sub>2</sub> both in [molec.cm<sup>-2</sup>.s<sup>-1</sup>] from 24 December at 20:00 to 31 December 2018 at 00:00 UTC in the aged plume.

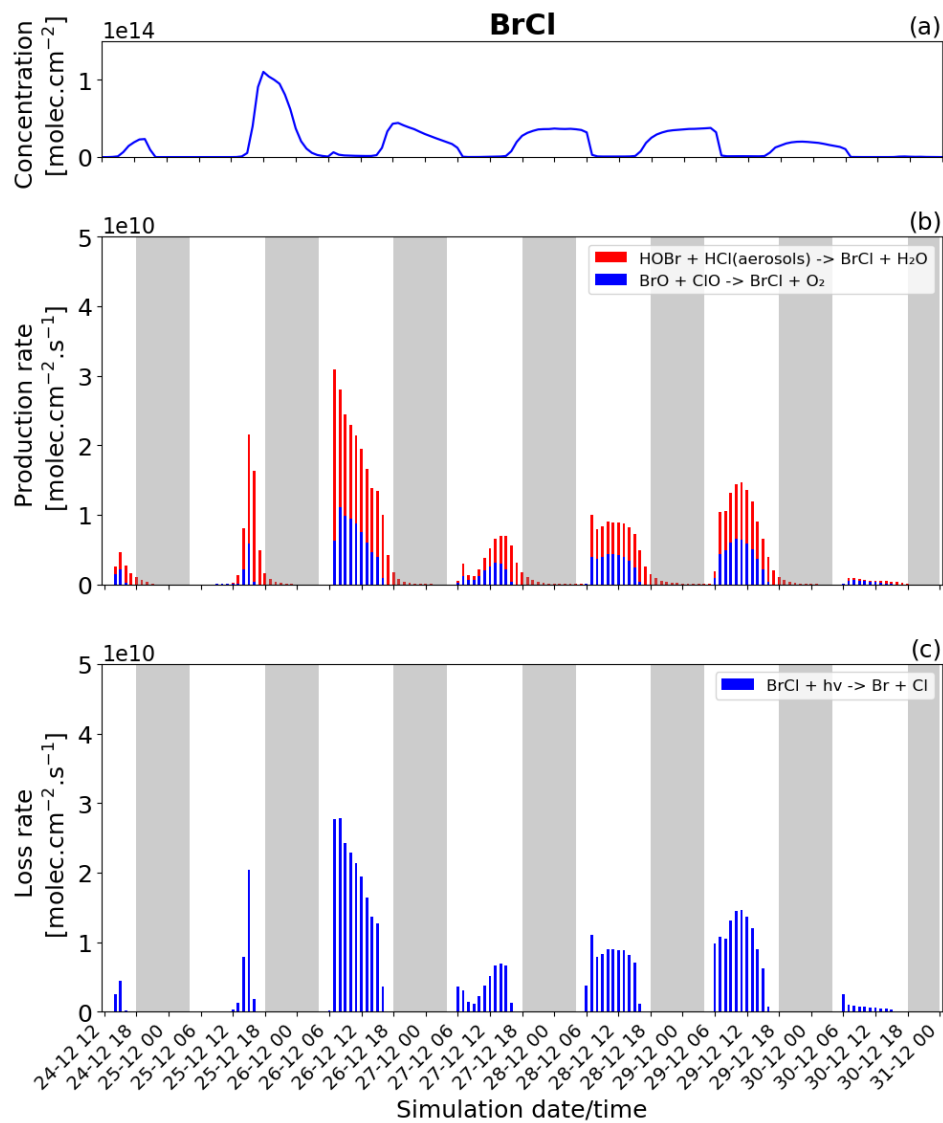

**Figure S13.** Time evolution of : (a) BrCl column concentration in  $[\text{molec.cm}^{-2}]$ , (b) production rates and (c) loss rates for BrCl both in  $[\text{molec.cm}^{-2}.\text{s}^{-1}]$  from 24 December at 14:00 to 31 December 2018 at 00:00 UTC in the young plume.

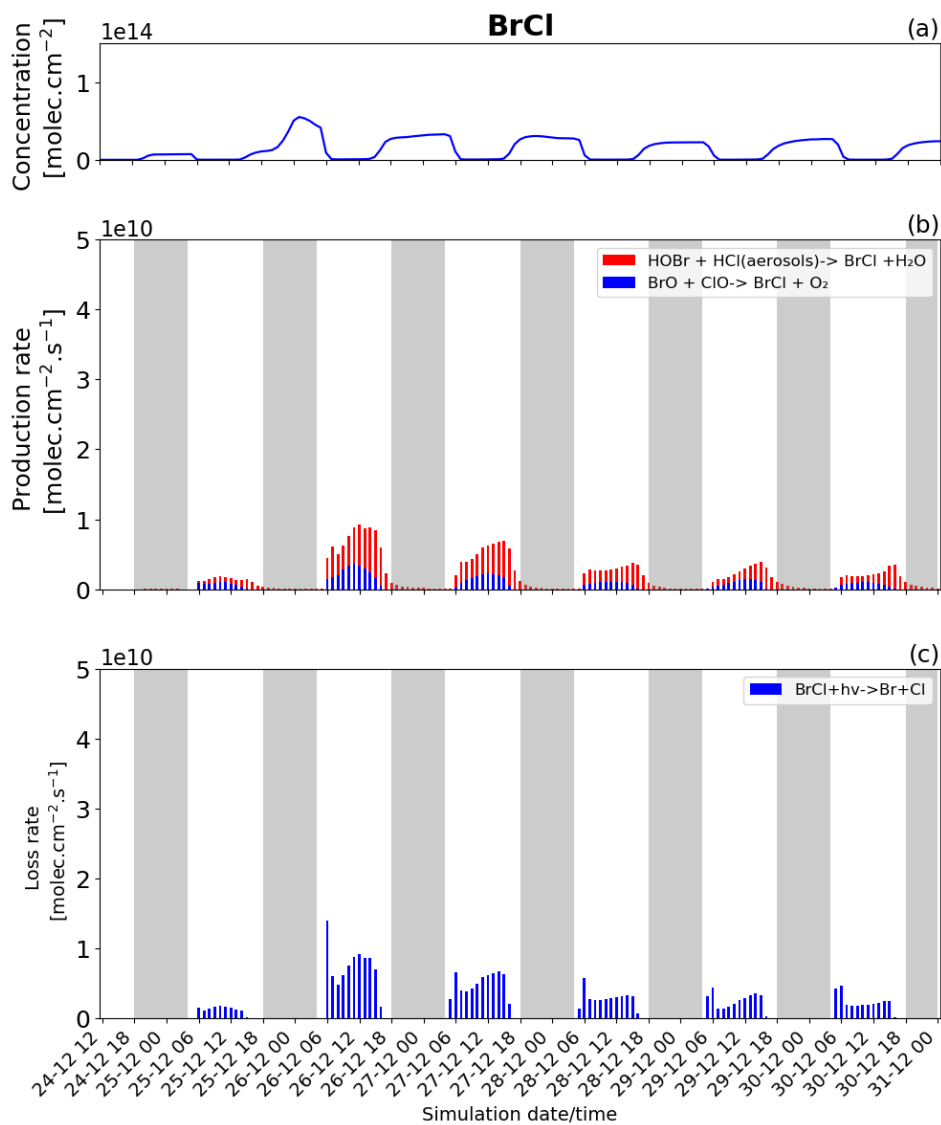

**Figure S14.** Time evolution of : (a) BrCl column concentration in  $[\text{molec.cm}^{-2}]$ , (b) production rates and (c) loss rates for BrCl both in  $[\text{molec.cm}^{-2}.\text{s}^{-1}]$  from 24 December at 20:00 to 31 December 2018 at 00:00 UTC in the aged plume.

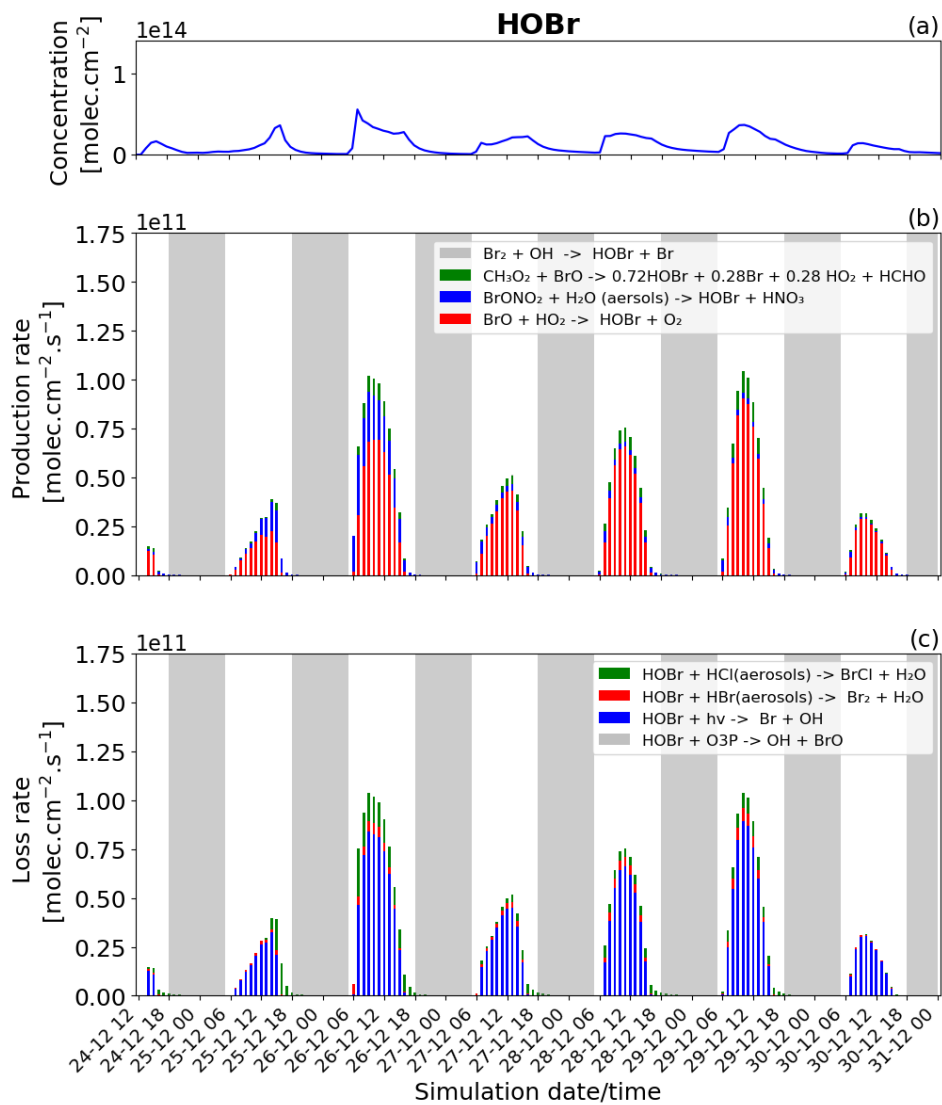

**Figure S15.** Time evolution of : (a) HOBr column concentration in  $[\text{molec.cm}^{-2}]$ , (b) production rates and (c) loss rates for HOBr both in  $[\text{molec.cm}^{-2}.\text{s}^{-1}]$  from 24 December at 14:00 to 31 December 2018 at 00:00 UTC in the young plume.



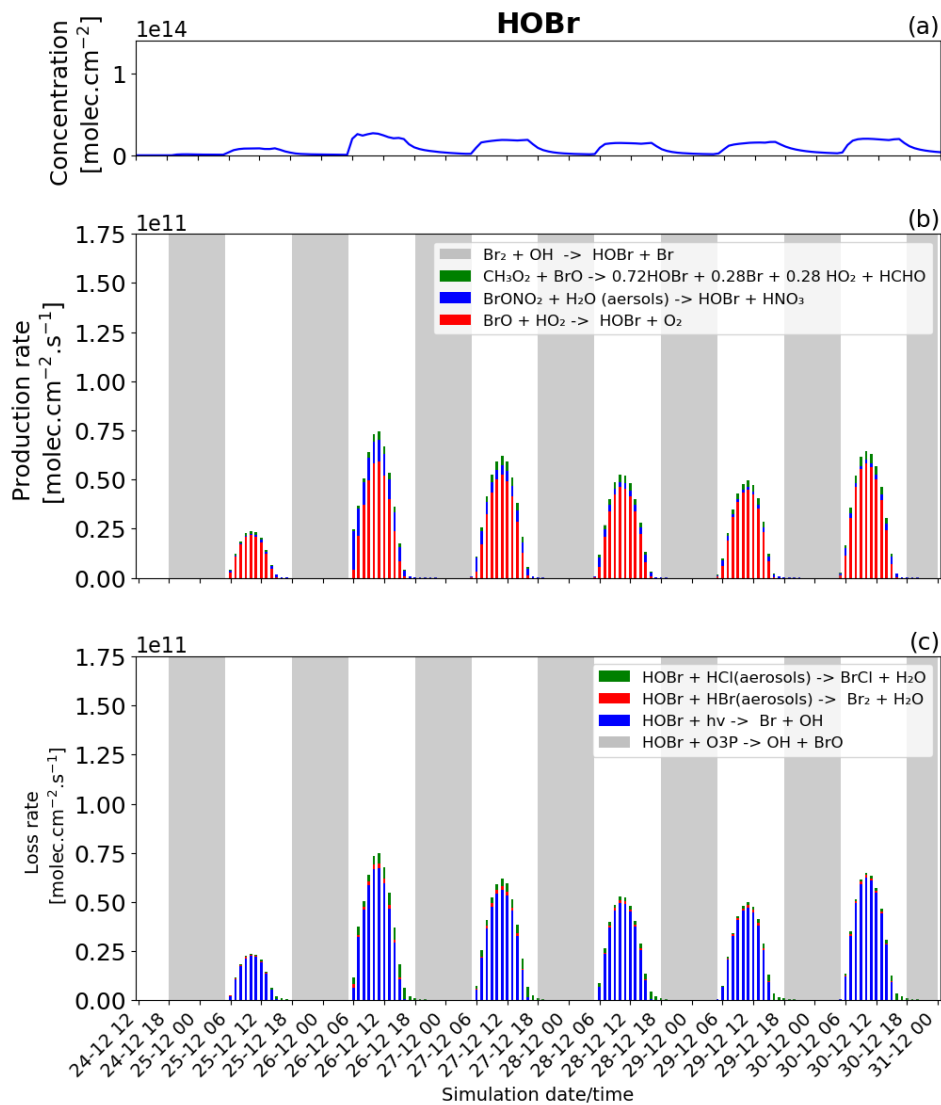

**Figure S16.** Time evolution of : (a) HOBr column concentration in  $[\text{molec.cm}^{-2}]$ , (b) production rates and (c) loss rates for HOBr both in  $[\text{molec.cm}^{-2}.\text{s}^{-1}]$  from 24 December at 20:00 to 31 December 2018 at 00:00 UTC in the aged plume.

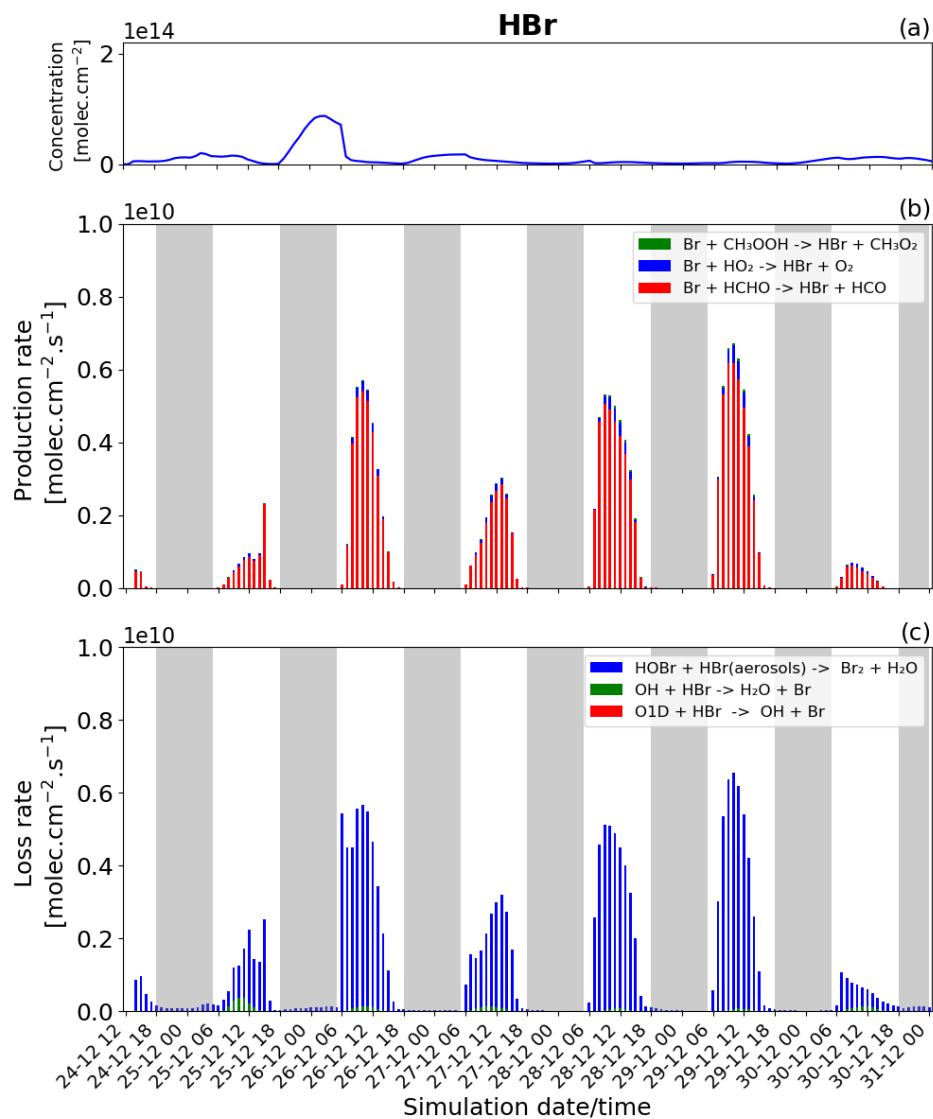

**Figure S17.** Time evolution of : (a) HBr column concentration in  $[\text{molec.cm}^{-2}]$ , (b) production rates and (c) loss rates for HBr both in  $[\text{molec.cm}^{-2}.\text{s}^{-1}]$  from 24 December at 14:00 to 31 December 2018 at 00:00 UTC in the young plume.

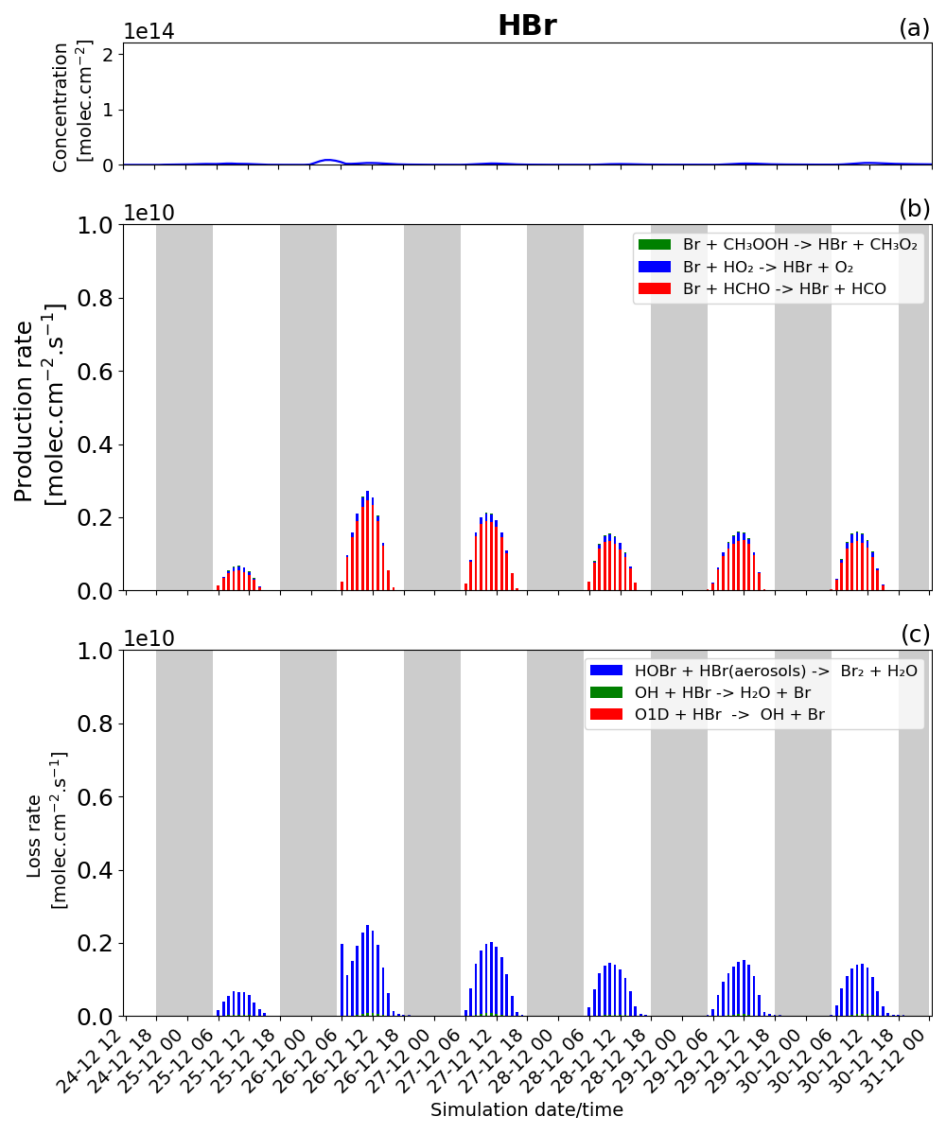

**Figure S18.** Time evolution of : (a) HBr column concentration in  $[\text{molec.cm}^{-2}]$ , (b) production rates and (c) loss rates for HBr both in  $[\text{molec.cm}^{-2}.\text{s}^{-1}]$  from 24 December at 20:00 to 31 December 2018 at 00:00 UTC in the aged plume.

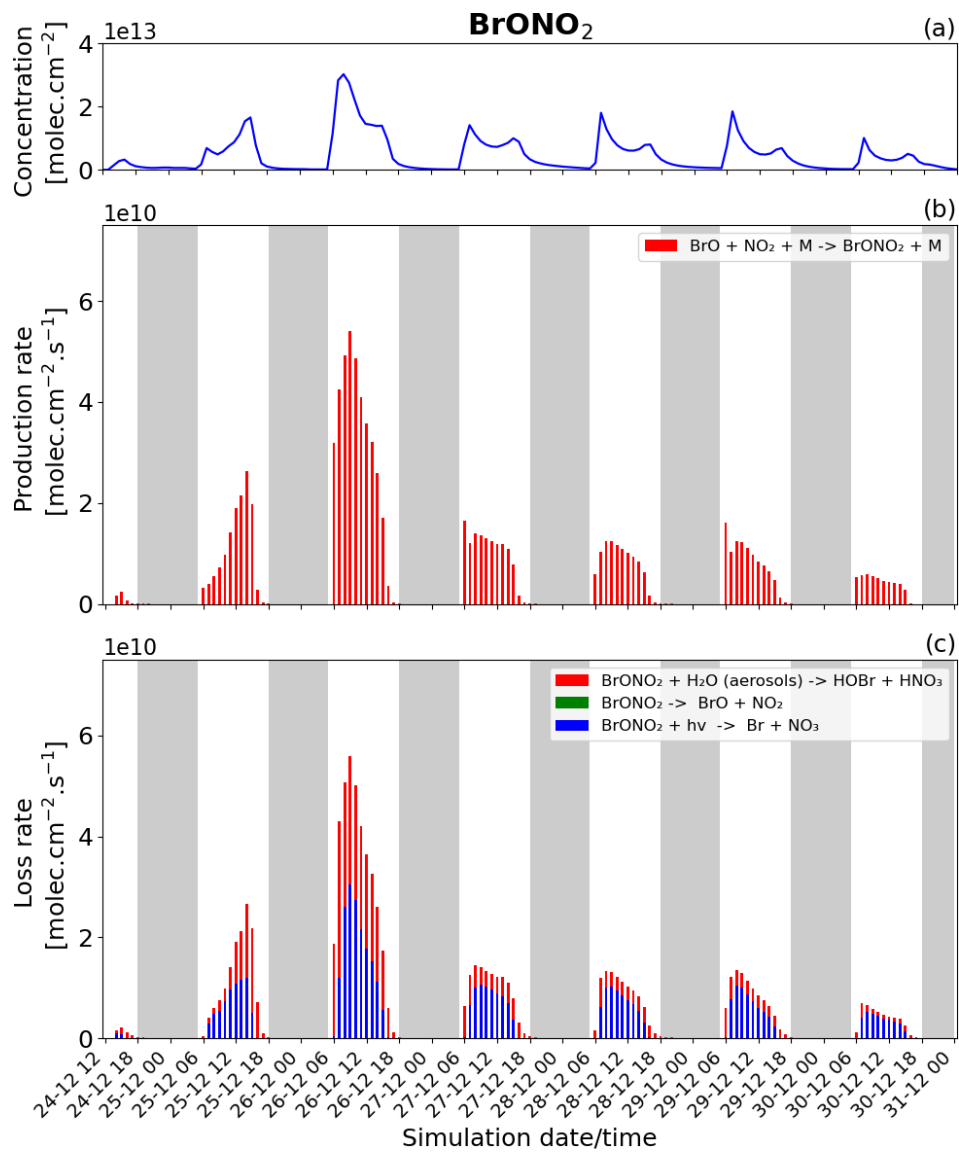

**Figure S19.** Time evolution of : (a) BrONO<sub>2</sub> column concentration in [molec.cm<sup>-2</sup>], (b) production rates and (c) loss rates for BrONO<sub>2</sub> both in [molec.cm<sup>-2</sup>.s<sup>-1</sup>] from 24 December at 14:00 to 31 December 2018 at 00:00 UTC in the young plume.

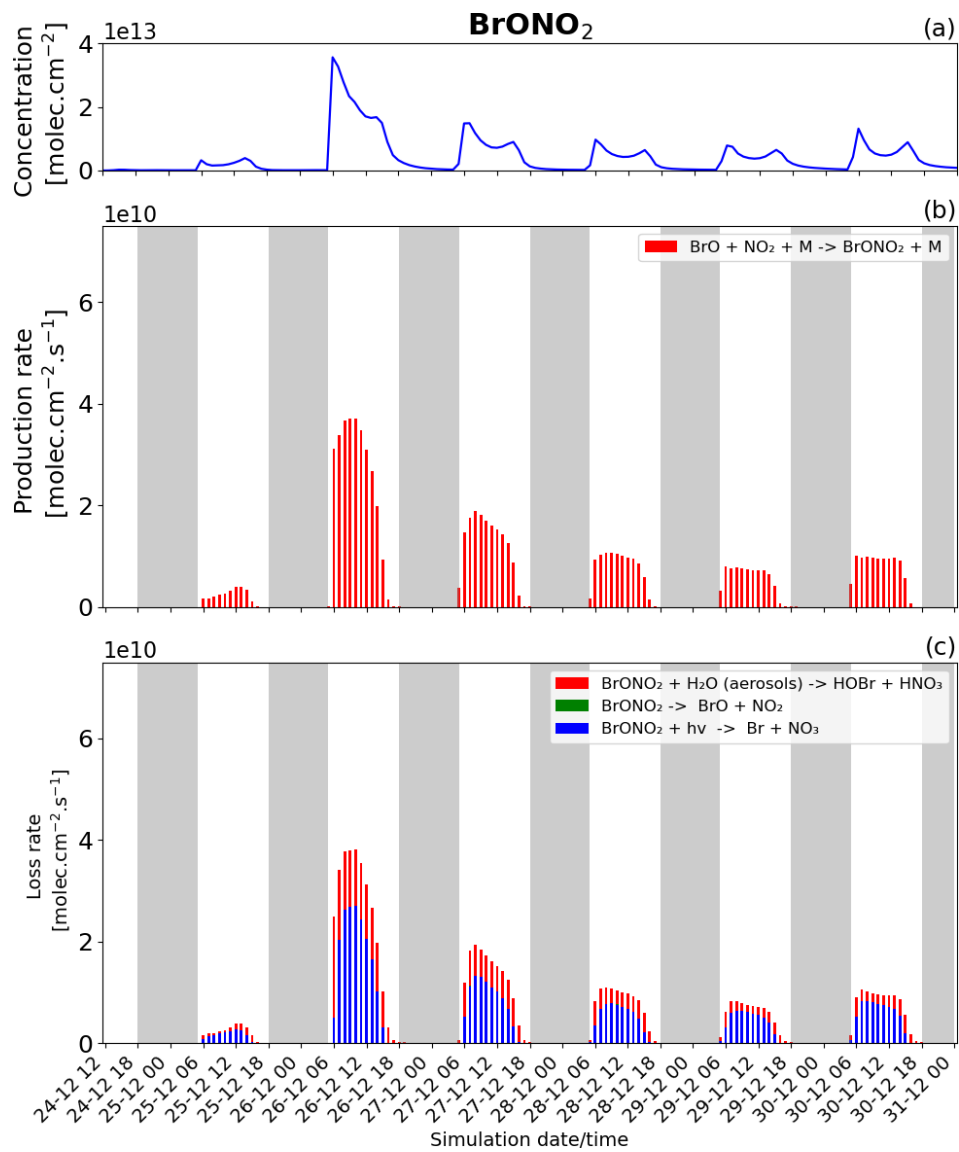

**Figure S20.** Time evolution of : (a) BrONO<sub>2</sub> column concentration in [molec.cm<sup>-2</sup>], (b) production rates and (c) loss rates for BrONO<sub>2</sub> both in [molec.cm<sup>-2</sup>.s<sup>-1</sup>] from 24 December at 20:00 to 31 December 2018 at 00:00 UTC in the aged plume.

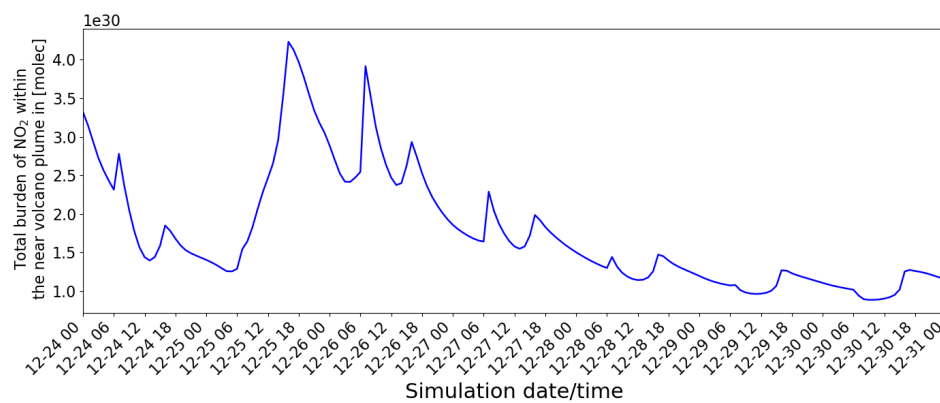

**Figure S21.** Time evolution of the total burden of the NO<sub>2</sub> within plume in [molec] from 24 December at 12:00 to 31 December 2018 at 00:00 UTC in the near volcano domain.

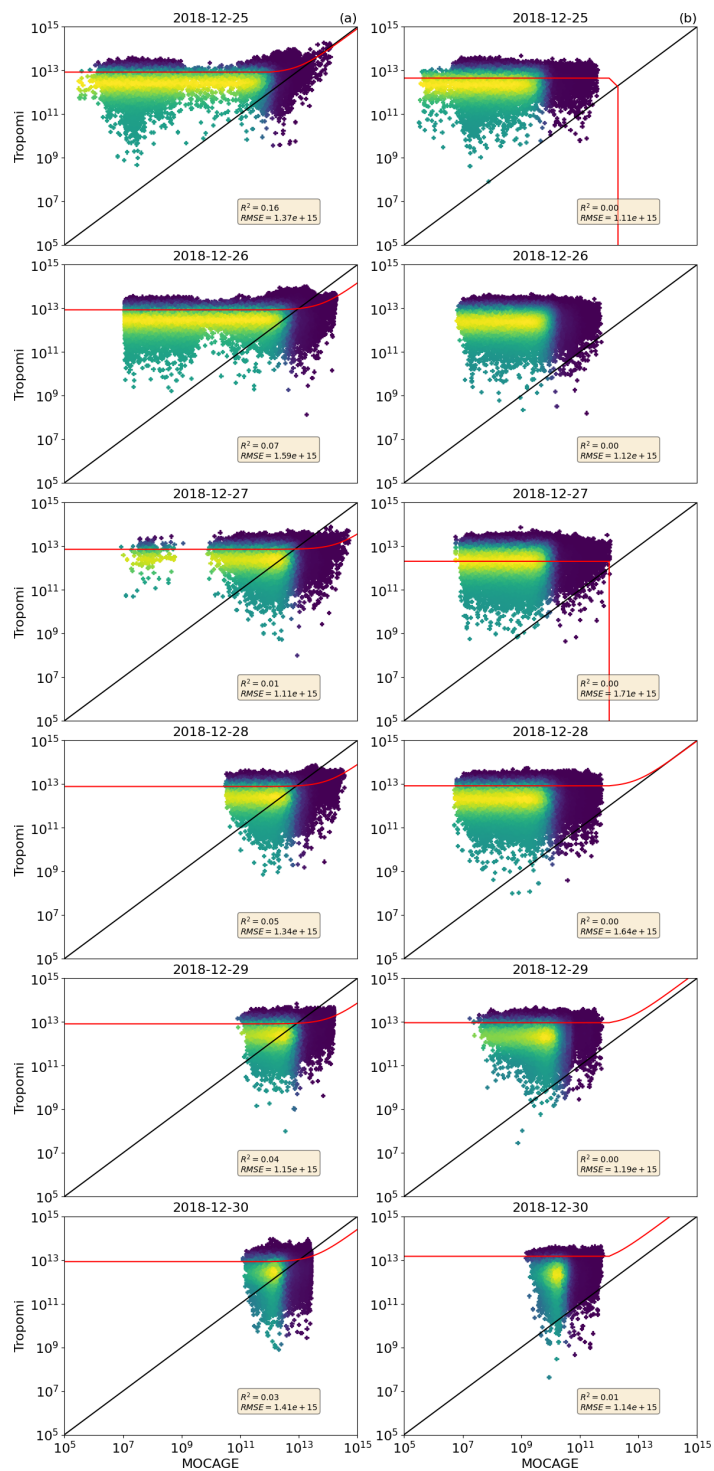

**Figure S22.** Linear regression of BrO column of TROPOMI and MOCAGE within volcanic plume (left column) and outside of the volcanic plume (right column) in  $\text{molec.cm}^{-2}$  from 25 to 30 December 2018 for the whole domain of the Mediterranean basin. The red lines correspond to the linear regression and 1:1 in black colour lines.
